# Supplementary material for: Efficacy and safety of once-weekly GLP-1 receptor agonist albiglutide (HARMONY 2): 52 week primary endpoint results from a randomised, placebo-controlled trial in patients with type 2 diabetes mellitus inadequately controlled with diet and exercise
Source: PubMed Central journal article supplement (PMC4705137; doi:10.1007/s00125-015-3795-1), 2015-11-17
Supplement: 125_2015_3795_MOESM2_ESM.pdf [file 125_2015_3795_MOESM2_ESM.pdf]

**ESM Table 1. Hyperglycemia rescue criteria**

| <b>Time interval on treatment</b> | <b>Hyperglycemia rescue</b>                                                |
|-----------------------------------|----------------------------------------------------------------------------|
| ≥Day 1 and <week 2                | No rescue                                                                  |
| ≥Week 2 and <week 4               | A single FPG ≥15.5 mmol/l (≥280 mg/dl) <sup>a</sup>                        |
| ≥Week 4 and <week 12              | A single FPG ≥13.9 mmol/l (≥250 mg/dl) <sup>a</sup>                        |
| ≥Week 12 and <week 24             | HbA <sub>1c</sub> ≥8.5% [69.39 mmol/mol] and ≤0.5% reduction from baseline |
| ≥Week 24 and <week 48             | HbA <sub>1c</sub> ≥8.5% [69.39 mmol/mol]                                   |
| ≥Week 48 and <week 156            | HbA <sub>1c</sub> ≥8.0% [63.93 mmol/mol]                                   |

<sup>a</sup>Confirmed by a second sample collected within 7 days analyzed by the central laboratory.

FPG, fasting plasma glucose, HbA<sub>1c</sub>, glycosylated hemoglobin
