# Supplementary material for: Efficacy and safety of once-weekly GLP-1 receptor agonist albiglutide (HARMONY 2): 52 week primary endpoint results from a randomised, placebo-controlled trial in patients with type 2 diabetes mellitus inadequately controlled with diet and exercise
Source: PubMed Central journal article supplement (PMC4705137; doi:10.1007/s00125-015-3795-1), 2015-11-17
Supplement: 125_2015_3795_MOESM3_ESM.pdf [file 125_2015_3795_MOESM3_ESM.pdf]

**ESM Table 2. Change in HbA<sub>1c</sub> from baseline at week 52 (ITT population)**

|                                                        | <b>Placebo</b><br><i>(n = 99)</i> | <b>Albiglutide</b><br><b>30 mg weekly</b><br><i>(n = 100)</i> | <b>Albiglutide</b><br><b>50 mg weekly</b><br><i>(n = 97)</i> |
|--------------------------------------------------------|-----------------------------------|---------------------------------------------------------------|--------------------------------------------------------------|
| <b>HbA<sub>1c</sub> (%) [mmol/mol]</b>                 |                                   |                                                               |                                                              |
| Baseline, mean (SD)                                    | 8.02 (0.908)<br>[64.15 (9.93)]    | 8.05 (0.867)<br>[64.47 (9.48)]                                | 8.21 (0.942)<br>[66.22 (10.30)]                              |
| Week 52, mean (SD)                                     | 8.20 (1.458)<br>[66.11 (15.94)]   | 7.35 (1.150)<br>[56.82 (12.57)]                               | 7.29 (1.104)<br>[56.17 (12.07)]                              |
| <b>Model-adjusted change from baseline<sup>a</sup></b> |                                   |                                                               |                                                              |
| % difference (SE)                                      | 0.15% (0.097)                     | -0.70% (0.096)                                                | -0.89% (0.097)                                               |
| <b>Difference from placebo</b>                         |                                   |                                                               |                                                              |
| % difference of least-squares means                    |                                   | -0.84%                                                        | -1.04%                                                       |
| 95% CI                                                 |                                   | (-1.11 to 0.58)                                               | (-1.31 to -0.77)                                             |
| Superiority <i>P</i> value                             |                                   | <0.0001                                                       | <0.0001                                                      |
| <b>Sensitivity analysis<sup>b</sup></b>                |                                   |                                                               |                                                              |
| <b>Model-adjusted change from baseline<sup>c</sup></b> |                                   |                                                               |                                                              |
| % difference (SE)                                      | -0.15% (0.091)                    | -0.85% (0.077)                                                | -1.09% (0.081)                                               |
| <b>Difference from placebo</b>                         |                                   |                                                               |                                                              |
| % difference of least-squares means                    |                                   | -0.70%                                                        | -0.94%                                                       |
| 95% CI                                                 |                                   | (-0.94 to -0.47)                                              | (-1.18 to 0.70)                                              |

|                            |  |         |         |
|----------------------------|--|---------|---------|
| Superiority <i>P</i> value |  | <0.0001 | <0.0001 |
|----------------------------|--|---------|---------|

HbA<sub>1c</sub>, glycosylated hemoglobin; SD, standard deviation; SE, standard error. <sup>a</sup>Adjusted for treatment group, region, history of prior myocardial infarction, and age category as factors and baseline HbA<sub>1c</sub>. <sup>b</sup>Sensitivity analyses were performed post hoc at the primary endpoint. <sup>c</sup>Based on mixed-model repeated measured analysis.
