# Supplementary material for: Efficacy and safety of once-weekly GLP-1 receptor agonist albiglutide (HARMONY 2): 52 week primary endpoint results from a randomised, placebo-controlled trial in patients with type 2 diabetes mellitus inadequately controlled with diet and exercise
Source: PubMed Central journal article supplement (PMC4705137; doi:10.1007/s00125-015-3795-1), 2015-11-17
Supplement: 125_2015_3795_MOESM4_ESM.pdf [file 125_2015_3795_MOESM4_ESM.pdf]

**ESM Table 3. On-therapy adverse events to week 52 and prior to hyperglycemic rescue  
(safety population)**

|                                                                                          | <b>Placebo<br/>(n = 101)</b> | <b>Albiglutide<br/>30 mg weekly<br/>(n = 101)</b> | <b>Albiglutide<br/>50 mg weekly<br/>(n = 99)</b> |
|------------------------------------------------------------------------------------------|------------------------------|---------------------------------------------------|--------------------------------------------------|
|                                                                                          | n / % / rate*                | n / % / rate*                                     | n / % / rate*                                    |
| <b>Most common adverse events (≥6.0% in either albiglutide group), by preferred term</b> |                              |                                                   |                                                  |
| Injection-site reaction                                                                  | 2 / 2.0 / 42.4               | 9 / 8.9 / 39.9                                    | 14 / 14.1 / 37.0                                 |
| Diarrhea                                                                                 | 4 / 4.0 / 5.7                | 9 / 8.9 / 14.7                                    | 11 / 11.1 / 13.5                                 |
| Nausea                                                                                   | 6 / 5.9 / 8.5                | 10 / 9.9 / 12.6                                   | 9 / 9.1 / 11.2                                   |
| Upper respiratory tract infection                                                        | 9 / 8.9 / 12.7               | 5 / 5.0 / 5.3                                     | 8 / 8.1 / 10.1                                   |
| Nasopharyngitis                                                                          | 5 / 5.0 / 7.1                | 6 / 5.9 / 7.4                                     | 6 / 6.1 / 6.7                                    |
| Sinusitis                                                                                | 2 / 2.0 / 2.8                | 3 / 3.0 / 3.2                                     | 7 / 7.1 / 10.1                                   |
| Urinary tract infection                                                                  | 3 / 3.0 / 8.5                | 0 / 0 / 0                                         | 6 / 6.1 / 9.0                                    |
| Headache                                                                                 | 13 / 12.9 / 22.6             | 10 / 9.9 / 16.8                                   | 5 / 5.1 / 7.9                                    |
| <b>Gastrointestinal adverse events</b>                                                   |                              |                                                   |                                                  |
| Any event                                                                                | 20 / 19.8 / 35.3             | 29 / 28.7 / 51.5                                  | 27 / 27.3 / 50.4                                 |
| Gastroesophageal reflux disease                                                          | 1 / 1.0 / 1.4                | 1 / 1.0 / 1.1                                     | 4 / 4.0 / 4.5                                    |
| Constipation                                                                             | 3 / 3.0 / 4.2                | 1 / 1.0 / 1.1                                     | 3 / 3.0 / 3.4                                    |
| Vomiting                                                                                 | 1 / 1.0 / 1.4                | 3 / 3.0 / 3.2                                     | 3 / 3.0 / 4.5                                    |
| Dyspepsia                                                                                | 3 / 3.0 / 4.2                | 1 / 1.0 / 2.1                                     | 1 / 1.0 / 1.1                                    |

\*Event rate per 100 patient-years.
