# Supplementary material for: Efficacy and safety of once-weekly GLP-1 receptor agonist albiglutide (HARMONY 2): 52 week primary endpoint results from a randomised, placebo-controlled trial in patients with type 2 diabetes mellitus inadequately controlled with diet and exercise
Source: PubMed Central journal article supplement (PMC4705137; doi:10.1007/s00125-015-3795-1), 2015-11-17
Supplement: 125_2015_3795_MOESM5_ESM.pdf [file 125_2015_3795_MOESM5_ESM.pdf]

**ESM Table 4. Hypoglycemia events through week 52 and prior to hyperglycemic rescue (safety population)**

|                        | Placebo<br>(n = 101)      |                  | Albiglutide<br>30 mg weekly<br>(n = 101) |                  | Albiglutide<br>50 mg weekly<br>(n = 99) |                  |
|------------------------|---------------------------|------------------|------------------------------------------|------------------|-----------------------------------------|------------------|
|                        | n / % / rate <sup>a</sup> | No. of<br>events | n / % / rate <sup>a</sup>                | No. of<br>events | n / % / rate <sup>a</sup>               | No. of<br>events |
| Any hypoglycemic event | 4 / 4.0 / 5.65            | 4                | 6 / 5.9 / 9.46                           | 9                | 6 / 6.1 / 10.09                         | 9                |
| Severity <sup>b</sup>  |                           |                  |                                          |                  |                                         |                  |
| Severe                 | 0                         | 0                | 0                                        | 0                | 0                                       | 0                |
| Documented symptomatic | 2 / 2.0 / 2.83            | 2                | 1 / 1.0 / 1.10                           | 1                | 0                                       | 0                |
| Asymptomatic           | 0                         | 0                | 0                                        | 0                | 2 / 2.0 / 2.24                          | 2                |
| Probable symptomatic   | 2 / 2.0 / 2.83            | 2                | 5 / 5.0 / 5.31                           | 7                | 2 / 2.0 / 2.24                          | 2                |
| Relative               | 0                         |                  | 1 / 1.0 / 1.05                           | 1                | 4 / 4.0 / 5.61                          | 5                |

<sup>a</sup>Event rate per 100 patient-years. <sup>b</sup>American Diabetes Association criteria (13). Severe—event requiring another person to administer a resuscitative action; Documented symptomatic—plasma glucose concentration  $\leq 3.9$  mmol/l (70 mg/dl) and presence of hypoglycemic symptoms; Asymptomatic—plasma glucose concentration  $\leq 3.9$  mmol/l (70 mg/dl) and no hypoglycemic symptoms; Probable symptomatic—typical hypoglycemic symptoms but plasma glucose concentration not measured; Relative—plasma glucose concentration  $> 3.9$  mmol/l (70 mg/dl) and typical hypoglycemic symptoms.

Note: While analysis of overall hypoglycemic events was prespecified, analysis of events that occurred pre-rescue was considered post hoc at the primary endpoint.
