# Supplementary material for: Efficacy and safety of once-weekly GLP-1 receptor agonist albiglutide (HARMONY 2): 52 week primary endpoint results from a randomised, placebo-controlled trial in patients with type 2 diabetes mellitus inadequately controlled with diet and exercise
Source: PubMed Central journal article supplement (PMC4705137; doi:10.1007/s00125-015-3795-1), 2015-11-17
Supplement: 125_2015_3795_MOESM6_ESM.pdf [file 125_2015_3795_MOESM6_ESM.pdf]

**ESM Table 5. Change from baseline to week 52 in vital signs, lipid parameters, and calcitonin (safety population)**

|                            | <b>Placebo<br/>(n = 101)</b> | <b>Albiglutide<br/>30 mg weekly<br/>(n = 101)</b> | <b>Albiglutide<br/>50 mg weekly<br/>(n = 99)</b> |
|----------------------------|------------------------------|---------------------------------------------------|--------------------------------------------------|
| Systolic (mm Hg)           | 1.3 (13.09)                  | -2.8 (12.14)                                      | -1.3 (13.37)                                     |
| Diastolic (mm Hg)          | 0.1 (9.17)                   | -0.8 (8.21)                                       | -0.8 (8.95)                                      |
| Heart rate (bpm)           | 0.8 (8.92)                   | 2.5 (8.44)                                        | 0.8 (9.00)                                       |
| Total cholesterol (mmol/L) | -0.057 (1.0454)              | -0.312 (0.8948)                                   | -0.101 (0.6237)                                  |
| LDL (mmol/L)               | -0.141 (0.6927)              | -0.278 (0.6999)                                   | -0.130 (0.5928)                                  |
| HDL (mmol/L)               | 0.079 (0.1508)               | 0.051 (0.1975)                                    | 0.042 (0.2250)                                   |
| Free fatty acid (mmol/L)   | -0.003 (0.2186)              | -0.038 (0.2170)                                   | -0.007 (0.2099)                                  |
| Triglycerides (mmol/L)     | 0.037 (1.9900)               | -0.379 (2.5157)                                   | 0.014 (0.8548)                                   |
| Calcitonin (pmol/L)        | -0.038 (0.479)               | 0.043 (0.113)                                     | 0.097 (0.237)                                    |

Data are mean (SD).
